# Supplementary material for: Forest impacts on snow accumulation and ablation across an elevation gradient in a temperate montane environment
Source: Copernicus journal article supplement (doi:10.5194/hess-21-5427-2017), 2017-11-06
Supplement: Supplementary file 1 [file hess-21-5427-2017-supplement.pdf]

Supplement of Hydrol. Earth Syst. Sci., 21, 5427–5442, 2017  
<https://doi.org/10.5194/hess-21-5427-2017-supplement>  
© Author(s) 2017. This work is distributed under  
the Creative Commons Attribution 3.0 License.

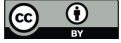

*Supplement of*

## **Forest impacts on snow accumulation and ablation across an elevation gradient in a temperate montane environment**

**Travis R. Roth and Anne W. Nolin**

*Correspondence to:* Travis R. Roth ([rothtra@science.oregonstate.edu](mailto:rothtra@science.oregonstate.edu))

The copyright of individual parts of the supplement might differ from the CC BY 3.0 License.

## 10 Supplemental Materials

**Table S1. Sensors on the Oregon ForEST Micro-Meteorological stations**

| Climate Variable   | Sensor Brand        | Model Number |
|--------------------|---------------------|--------------|
| Air Temp/RH        | Climatronics        | 102798-G0-H1 |
| Solar Radiation    | Li-Cor, Inc         | Li-200SL     |
| Wind Speed/Dir     | Met-One             | 034B         |
| Snow Depth         | Campbell Scientific | SR-50A       |
| Soil Temp/Moisture | Decagon Devices     | 5TM          |
| Datalogger         | Campbell Scientific | CR1000x      |

**Table S2. Algorithms for Estimating Clear Sky and Cloud Corrected Emissivity**

| Source                        | Algorithm                                                                                                                                                                                                                                                                                    |
|-------------------------------|----------------------------------------------------------------------------------------------------------------------------------------------------------------------------------------------------------------------------------------------------------------------------------------------|
| <b>Clear sky emissivity</b>   |                                                                                                                                                                                                                                                                                              |
| Prata (1996)                  | $\varepsilon_{\text{clear}} = 1 - (1 + w) \exp^{-(1.2+3w)^{0.5}}$ $w = 465 \frac{e_o}{T_o}$                                                                                                                                                                                                  |
| Dilley and O'Brien (1998)     | $\varepsilon_{\text{clear}} = (5.31 * 10^{-13} \frac{T_{\text{air}}^2}{\sigma})$                                                                                                                                                                                                             |
| <b>Cloud cover correction</b> |                                                                                                                                                                                                                                                                                              |
| Unsworth and Montieth (1975)  | $\varepsilon_{\text{adj}} = (1 - 0.84 * c)$                                                                                                                                                                                                                                                  |
| Kimball et al. (1982)         | $L_{\downarrow} = L_{\text{clear}} + \tau_8 * c * f_8 * \sigma * T_c^4$ $\tau_8 = 1 - \varepsilon_{z_8} (1.4 - 0.4 * \varepsilon_{z_8})$ $\varepsilon_{z_8} = 0.24 + 2.98 * 10^{-6} * \varepsilon_o^2 * \exp \frac{3000}{T_o}$ $f_8 = -0.6732 + 0.624 * 10^{-2} T_c - 0.914 * 10^{-5} T_c^2$ |
| Crawford and Duchon (1999)    | $\varepsilon_{\text{adj}} = (1 - S) + S \varepsilon_{\text{clear}}$                                                                                                                                                                                                                          |

**Table S3. Estimated RMSE from six longwave algorithms at two sites**

| Site   | Method          | RMSE (W m <sup>-2</sup> ) |
|--------|-----------------|---------------------------|
| Forest | Kimball-Dilley  | 26.8                      |
|        | Kimball-Prata   | 50.1                      |
|        | Unsworth-Dilley | 15.8                      |
|        | Unsworth-Prata  | 9.1                       |
|        | Crawford-Dilley | 9.3                       |
|        | Crawford-Prata  | 8.5                       |
| Open   | Kimball-Dilley  | 31.7                      |
|        | Kimball-Prata   | 77.6                      |
|        | Unsworth-Dilley | 31.1                      |
|        | Unsworth-Prata  | 24.5                      |
|        | Crawford-Dilley | 22.6                      |
|        | Crawford-Prata  | 26.1                      |

**Table S4: List of abbreviations**

|                                 |                                                                      |
|---------------------------------|----------------------------------------------------------------------|
| <b><i>BRT</i></b>               | Binary regression tree                                               |
| <b><i>CC</i></b>                | Canopy closure (%)                                                   |
| <b><i>C<sub>e</sub></i></b>     | Bulk transfer coefficient for vapor exchange                         |
| <b><i>C<sub>en</sub></i></b>    | Bulk transfer coefficient for vapor exchange under neutral stability |
| <b><i>C<sub>h</sub></i></b>     | Bulk transfer coefficient for sensible heat                          |
| <b><i>C<sub>IE</sub></i></b>    | Canopy Interception Efficiency (%)                                   |
| <b><i>C<sub>p</sub></i></b>     | specific heat of dry air (J kg <sup>-1</sup> K <sup>-1</sup> )       |
| <b><i>DBH</i></b>               | Diameter at breast height (m)                                        |
| <b><i>e<sub>a</sub></i></b>     | Atmospheric vapor pressure at height Z above snow surface (Pa)       |
| <b><i>ε<sub>adj</sub></i></b>   | Adjusted atmospheric emissivity                                      |
| <b><i>ε<sub>clear</sub></i></b> | Atmospheric emissivity                                               |
| <b><i>e<sub>0</sub></i></b>     | Vapor pressure at the snow surface (Pa)                              |
| <b><i>ε<sub>snow</sub></i></b>  | Snow surface emissivity                                              |
| <b><i>ForEST Network</i></b>    | Forest Elevation Snow Transect Network                               |
| <b><i>F<sub>S</sub></i></b>     | Forest site                                                          |
| <b><i>g</i></b>                 | Acceleration due to gravity (m s <sup>-2</sup> )                     |
| <b><i>k</i></b>                 | von Karman's constant                                                |
| <b><i>L<sup>↑</sup></i></b>     | Longwave radiation emitted by the snowpack (W m <sup>-2</sup> )      |
| <b><i>L<sup>↓</sup></i></b>     | Longwave radiation received by the snowpack (W m <sup>-2</sup> )     |
| <b><i>LAI</i></b>               | Leaf area index                                                      |
| <b><i>L<sub>clear</sub></i></b> | Incoming longwave radiation under clear skies (W m <sup>-2</sup> )   |
| <b><i>L<sub>v</sub></i></b>     | Latent heat of vaporization or sublimation (J kg <sup>-1</sup> )     |
| <b><i>MRB</i></b>               | McKenzie River Basin                                                 |
| <b><i>NRCS</i></b>              | Natural Resources Conservation Service                               |
| <b><i>O<sub>S</sub></i></b>     | Open site                                                            |
| <b><i>Pa</i></b>                | Total atmospheric pressure (Pa)                                      |
| <b><i>PNW</i></b>               | Pacific Northwest                                                    |
| <b><i>ΔQ</i></b>                | Change in total energy at the snow surface (W m <sup>-2</sup> )      |
| <b><i>Q<sub>C</sub></i></b>     | Conductive energy (W m <sup>-2</sup> )                               |
| <b><i>Q<sub>E</sub></i></b>     | Latent heat (W m <sup>-2</sup> )                                     |
| <b><i>Q<sub>H</sub></i></b>     | Sensible heat (W m <sup>-2</sup> )                                   |
| <b><i>Q<sub>L</sub></i></b>     | Total longwave radiation (W m <sup>-2</sup> )                        |
| <b><i>Q<sub>S</sub></i></b>     | Total solar radiation (W m <sup>-2</sup> )                           |
| <b><i>r</i></b>                 | Solar ratio (%)                                                      |
| <b><i>r<sub>s</sub></i></b>     | Spearman's rank correlation coefficient                              |

|                              |                                                                    |
|------------------------------|--------------------------------------------------------------------|
| <b><math>Ri_B</math></b>     | Bulk Richardson number                                             |
| <b><math>RMSE</math></b>     | Root mean squared error                                            |
| <b><math>ROS</math></b>      | Rain on snow                                                       |
| <b><math>SDD</math></b>      | Snow disappearance date                                            |
| <b><math>S_{in}</math></b>   | Incoming solar radiation ( $W m^{-2}$ )                            |
| <b><math>S_{out}</math></b>  | Reflected solar radiation ( $W m^{-2}$ )                           |
| <b><math>S_{VF}</math></b>   | Sky view fraction (%)                                              |
| <b><math>SWE</math></b>      | Snow Water Equivalent                                              |
| <b><math>T_{air}</math></b>  | Air Temperature (K)                                                |
| <b><math>T_c</math></b>      | Forest canopy temperature (K)                                      |
| <b><math>T_{dew}</math></b>  | Dewpoint temperature (K)                                           |
| <b><math>T_{snow}</math></b> | Snow surface temperature (K)                                       |
| <b><math>U(z)</math></b>     | Wind speed ( $m s^{-1}$ ) at height $Z$ (m) above the snow surface |
| <b><math>\omega</math></b>   | Precipitable water (cm)                                            |
| <b><math>WY</math></b>       | Water year                                                         |
| <b><math>Z_0</math></b>      | Surface roughness length (m)                                       |
| <b><math>\alpha</math></b>   | Albedo                                                             |
| <b><math>\rho_a</math></b>   | Density of air ( $kg m^{-3}$ )                                     |
| <b><math>\sigma</math></b>   | Stefan-Boltzman constant                                           |

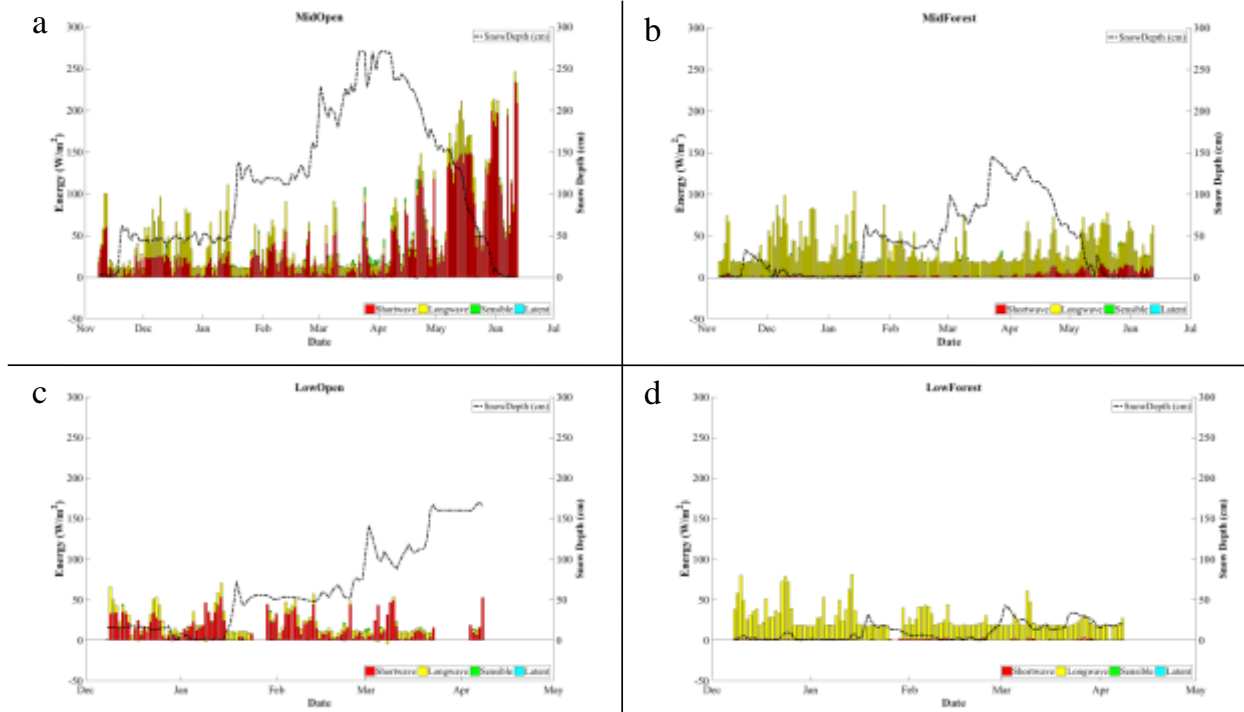

10 **Figure S1: WY 2012 calculated daily mean energy balance component magnitudes (bars) and the daily measured snow depth (dashed line) for Mid-Open (a); Mid-Forest (b); Low-Open (c); and Low-Forest (d).**

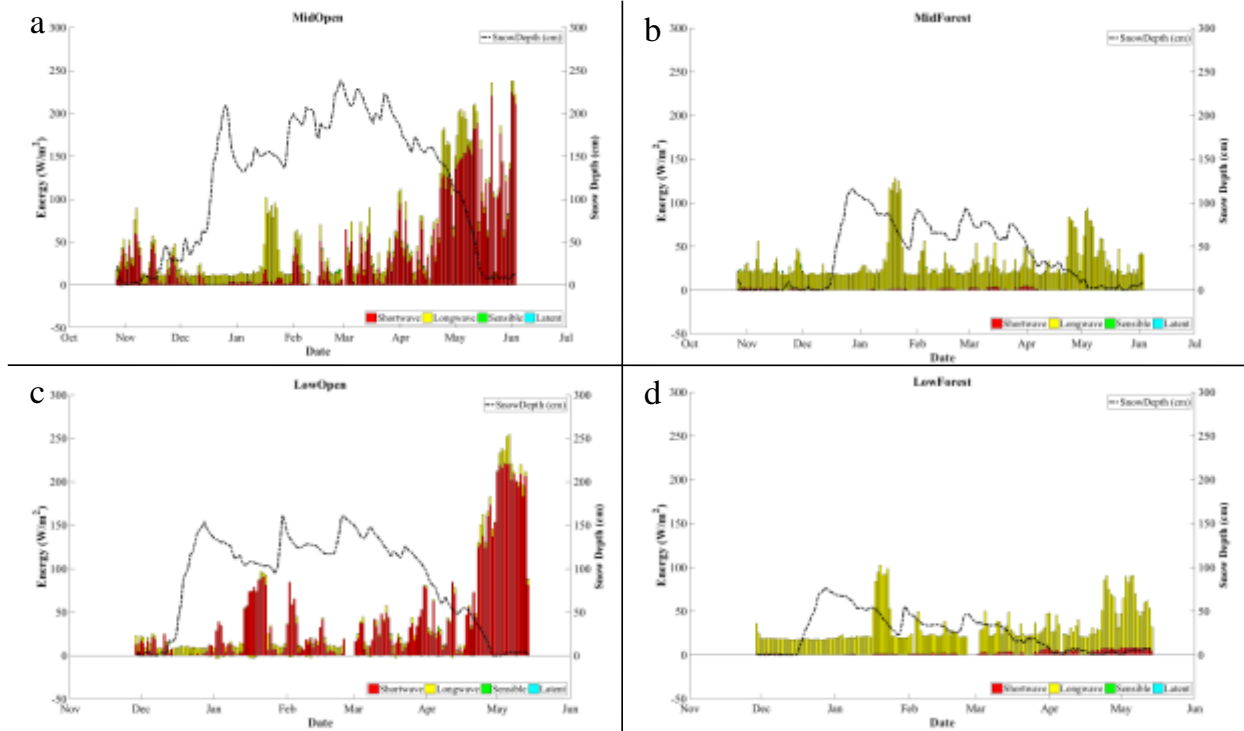

Figure S2: WY 2013 calculated daily mean energy balance component magnitudes (bars) and the daily measured snow depth (dashed line) for Mid-Open (a); Mid-Forest (b); Low-Open (c); and Low-Forest (d).

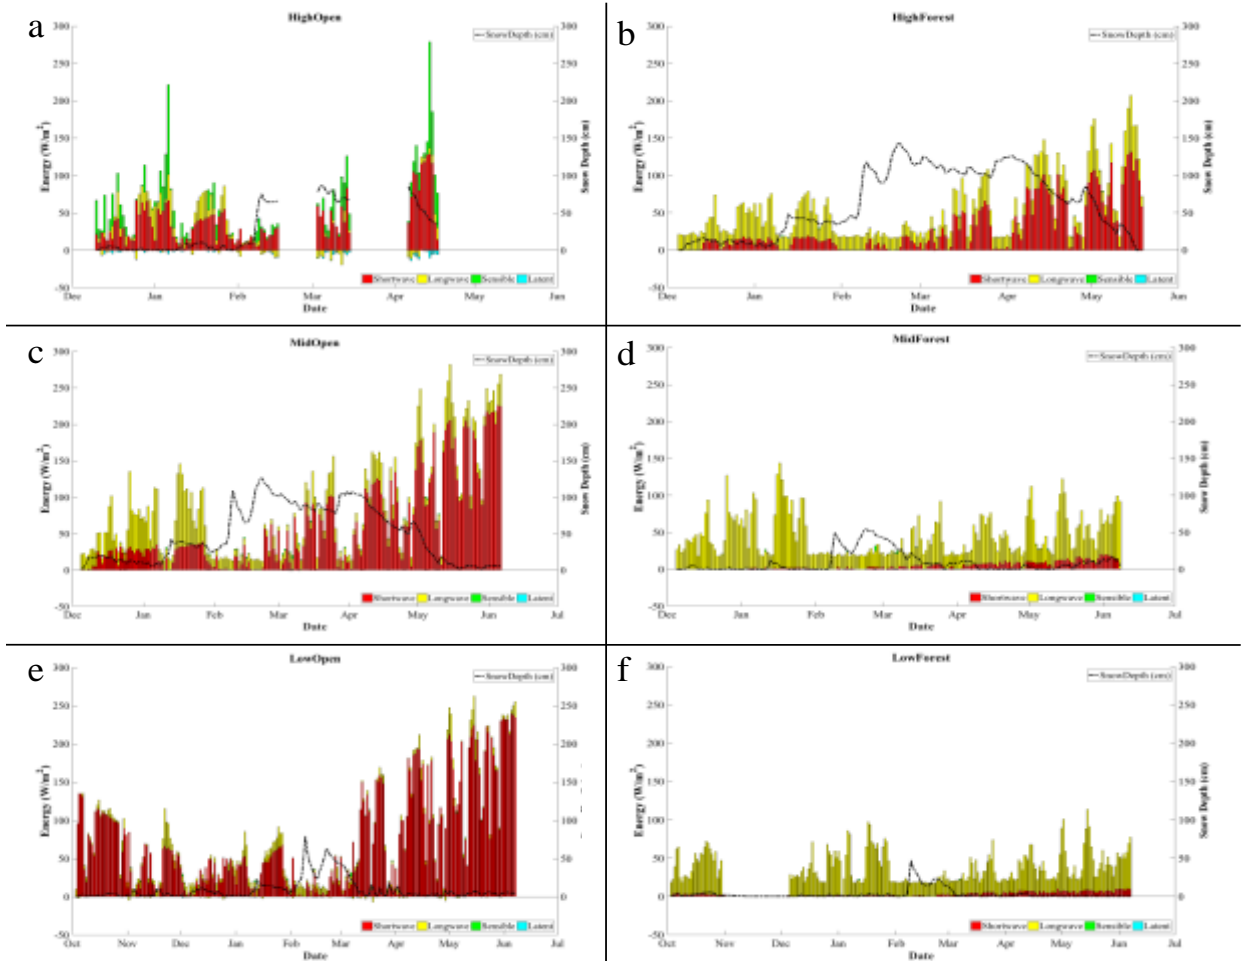

15

Figure S3: WY 2014 calculated daily mean energy balance component magnitudes (bars) and the daily measured snow depth (dashed line) for High-Open (a); High-Forest (b); Mid-Open (c); Mid-Forest (d); Low-Open (e); and Low-Forest (f).

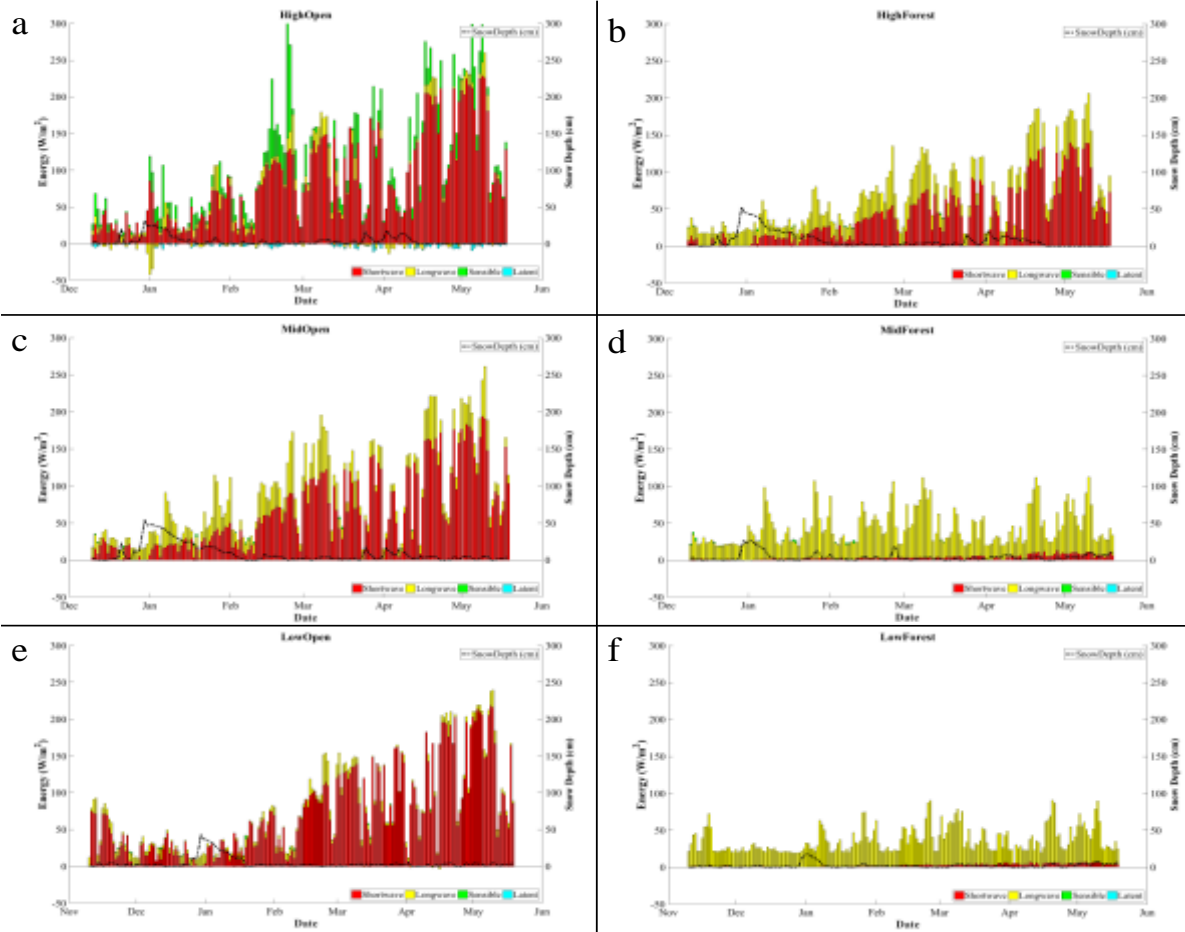

20

**Figure S1:** WY 2015 calculated daily mean energy balance component magnitudes (bars) and the daily measured snow depth (dashed line) for High-Open (a); High-Forest (b); Mid-Open (c); Mid-Forest (d); Low-Open (e); and Low-Forest (f).
